# Supplementary material for: Genetic and Clinical Factors Associated with Olokizumab Treatment in Russian Patients with Rheumatoid Arthritis
Source: MDPI journal article supplement (doi:10.3390/jpm12040641), 2022-04-15
Supplement: s1 [file s1]

**Supplementary Table S1.** The MAFs of the non-HLA SNPs that demonstrated significant associations with the efficacy and safety of olokizumab.

| Gene            | SNP        | Genotype | MAF Total<br>GnomAD | MAF European<br>(Non-Finnish) |
|-----------------|------------|----------|---------------------|-------------------------------|
| <i>TNFRSF1A</i> | rs767455   | T/C      | 0.399               | -                             |
| <i>TNFRSF1A</i> | rs1800692  | A/G      | 0.291               | 0.227                         |
| <i>TNFAIP3</i>  | rs6920220  | G/A      | 0.158               | 0.208                         |
| <i>DHODH</i>    | rs3213422  | A/C      | 0.446               | 0.507                         |
| <i>FPGS</i>     | rs10987742 | C/T      | 0.242               | 0.231                         |
| <i>AMPD1</i>    | rs17602729 | G/A      | 0.086               | 0.129                         |
| <i>ABCC1</i>    | rs3784864  | A/A      | 0.404               | 0.517                         |
| <i>ABCB1</i>    | rs2032582  | A/C      | 0.539               | 0.549                         |
| <i>ABCB1</i>    | rs1045642  | A/G      | 0.439               | -                             |
| <i>TLR5</i>     | rs5744174  | A/G      | 0.385               | 0.437                         |
| <i>GLCC1</i>    | rs37972    | T/C      | 0.362               | -                             |
| <i>CCR6</i>     | rs3093024  | A/G      | 0.389               | 0.294                         |
| <i>PADI4</i>    | rs874881   | G/C      | 0.478               | -                             |
| <i>PADI4</i>    | rs2240336  | C/T      | 0.428               | 0.402                         |
| <i>PADI4</i>    | rs2301888  | G/A      | 0.317               | 0.347                         |
| <i>PADI4</i>    | rs2240335  | C/A      | 0.389               | 0.349                         |
| <i>PADI4</i>    | rs2240340  | T/C      | 0.455               | -                             |
| <i>PADI4</i>    | rs11203366 | G/A      | 0.449               | -                             |
| <i>PADI4</i>    | rs1748032  | C/T      | 0.632               | 0.649                         |
| <i>PADI4</i>    | rs11203367 | C/T      | 0.441               | -                             |
| <i>IL23R</i>    | rs1884444  | G/T      | 0.486               | -                             |
| <i>IL23R</i>    | rs7539625  | G/A      | 0.326               | -                             |
| <i>IL17A</i>    | rs1974226  | C/T      | 0.153               | 0.18                          |
| <i>IL18</i>     | rs360722   | A/G      | 0.183               | 0.173                         |
| <i>IL18</i>     | rs360718   | A/C      | 0.258               | -                             |
| <i>IL6R</i>     | rs2228145  | A/C      | 0.379               | 0.396                         |
| <i>IL2RA</i>    | rs2104286  | T/C      | 0.179               | -                             |
| <i>IL2RB</i>    | rs3218253  | G/A      | 0.218               | 0.268                         |
| <i>IL1RN</i>    | rs419598   | T/C      | 0.256               | 0.273                         |
| <i>IL1B</i>     | rs1143634  | G/A      | 0.192               | 0.241                         |
| <i>IL1B</i>     | rs16944    | G/A      | 0.421               | 0.332                         |
| <i>IL1B</i>     | rs1143623  | C/G      | 0.240               | -                             |
